# Supplementary material for: Economic Evaluation of Extended-Release Buprenorphine for Persons With Opioid Use Disorder
Source: PubMed Central journal article supplement (PMC10500382; doi:10.1001/jamanetworkopen.2023.29583), 2023-09-13
Supplement: jamanetwopen-e2329583-s002.pdf [file jamanetwopen-e2329583-s002.pdf]

## Data Sharing Statement

Flam-Ross. Economic Evaluation of Extended-Release Buprenorphine for Persons With Opioid Use Disorder. *JAMA Netw Open*. Published September 07, 2023.

doi:10.1001/jamanetworkopen.2023.29583

### Data

**Data available:** No

### Additional Information

**Explanation for why data not available:** The data that we employ to build the simulation do not belong to us – we employ secondary data analysis to build the simulation. We therefore cannot share those data. Supplemental materials for the RESPOND model are available at <https://www.syndemicslab.org/>.
